# Supplementary material
Source: publisher site journal article supplement (https://www.dovepress.com/article/512339)
Supplement: Supplementary file 1 [file 512339%2520Revised%2520Supplementary%2520Tables.docx]

**Supplementary Table 2 Univariate analysis of demographic information between the two groups**

| Variable | Cases(Ischemic Stroke)  (N=163) | Controls  (N=163) | Odds Ratioa  95% CI | *P value* |
| --- | --- | --- | --- | --- |
| Ethnic group | N=163 | N=163 |  |  |
| Han | 158(96.9) | 151(92.6) | 0.575(0.236-1.401) | 0.223 |
| Non-han | 5(3.1) | 12(7.4) | Reference |  |
| Marital status | N=163 | N=163 |  |  |
| Married | 129(79.1) | 146(89.6) | 1.421(0.974-2.074) | 0.068 |
| Unmarried | 34(20.9) | 17(10.4) | Reference |  |
| Area of residence | N=163 | N=163 |  |  |
| Town | 147(90.2) | 154(94.5) | 1.310(0.782-2.195) | 0.304 |
| Rural | 16(9.8) | 9(5.5) | Reference |  |

a Obtained accounting for matching by age and sex using a conditional logistic regression

CI, confidence interval;

Supplementary Table 3 Results of the multiplicative interaction between hypertension and current drinkers

| Variable | *β* | *SE* | Wald χ2 values | *P* values | Odds Ratio（95% CI） |
| --- | --- | --- | --- | --- | --- |
| Hypertension | 0.834 | 0.240 | 12.060 | 0.001 | 2.302（1.438-3.684） |
| Current drinkers | 0.891 | 0.384 | 5.375 | 0.020 | 2.437（1.148-5.175） |
| Hypertension*Current drinkers | -0.583 | 0.436 | 1.787 | 0.181 | 0.558（0.238-1.312） |

CI, confidence interval
